# Supplementary material for: Inhibition of fatty acid uptake by TGR5 prevents diabetic cardiomyopathy
Source: Springer Nature journal article supplement (doi:10.1038/s42255-024-01036-5), 2024-05-02
Supplement: MOESM1 [file 42255_2024_1036_MOESM1_ESM.pdf]

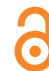

---

# Inhibition of fatty acid uptake by TGR5 prevents diabetic cardiomyopathy

---

In the format provided by the authors and unedited

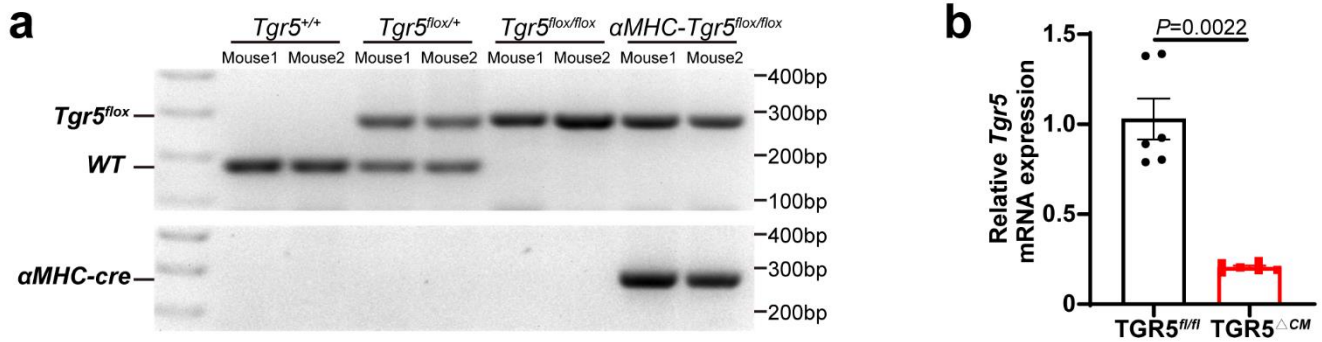

**Supplementary Fig. 1** The genotype of *Tgr5<sup>lox/lox</sup>* mice and validation of cardiomyocyte-specific TGR5 deleted mice. **a**, Genotyping of *Tgr5<sup>lox/lox</sup>* mice. **b**, Relative mRNA level of TGR5 in cardiac tissues from *TGR5<sup>fl/fl</sup>* and *TGR5<sup>ΔCM</sup>* mice. n = 6. Data are presented as mean ± SEM. Statistical significance was evaluated by two-tailed nonparametric Mann–Whitney test.

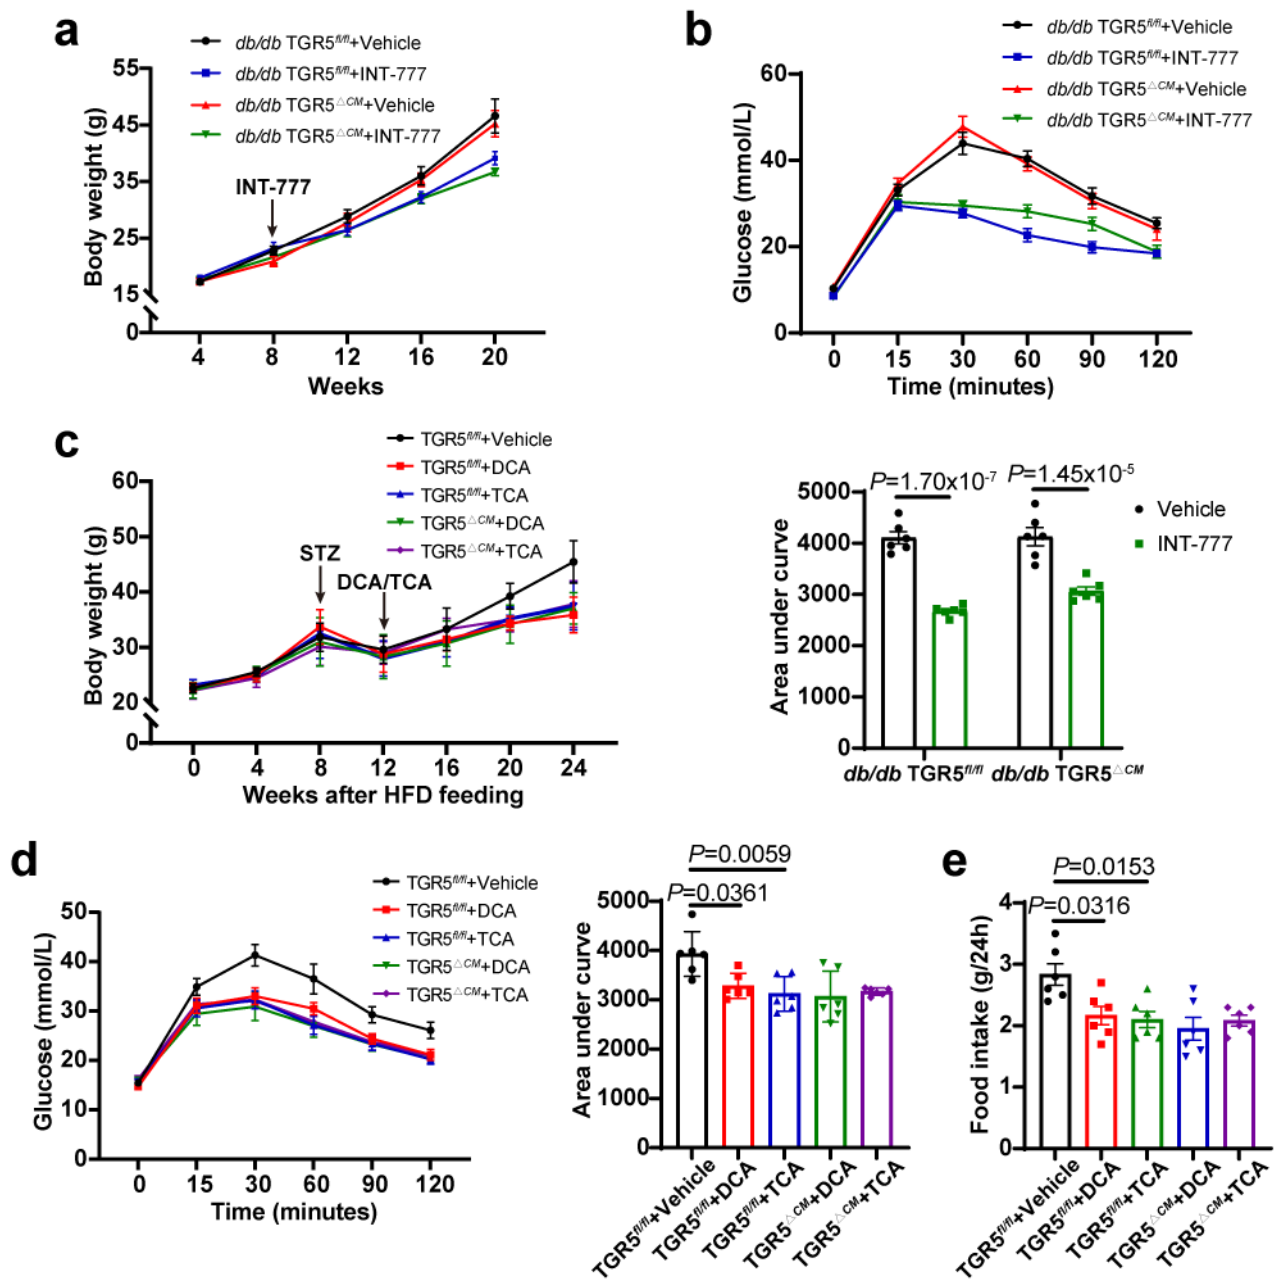

**Supplementary Fig. 2 The metabolic phenotype of *db/db* mice treated with INT-777 or HFD/STZ-induced mice treated with bile acids.** **a**, Continuous body weight detection of *db/db* TGR5<sup>fl/fl</sup> and *db/db* TGR5<sup>ΔCM</sup> mice aged 20 weeks with INT-777 treatment or Vehicle for 12 weeks. n = 6. **b**, Intraperitoneal glucose tolerance test of *db/db* TGR5<sup>fl/fl</sup> and *db/db* TGR5<sup>ΔCM</sup> mice treated with INT-777 for 12 weeks (1 g/kg D-glucose). n = 6. **c**, Continuous body weight detection of TGR5<sup>fl/fl</sup> and TGR5<sup>ΔCM</sup> mice challenged with HFD/STZ with DCA or TCA treatment for 12 weeks. n = 6. **d**, Intraperitoneal glucose tolerance test of TGR5<sup>fl/fl</sup> and TGR5<sup>ΔCM</sup> mice challenged with HFD/STZ with DCA or TCA treatment for 12 weeks (1 g/kg D-glucose). n = 6. **e**, 24-hour food intake of TGR5<sup>fl/fl</sup> and TGR5<sup>ΔCM</sup> mice challenged with HFD/STZ with DCA or TCA treatment for 12 weeks. The mice were fasted for 24 h and subsequently exposed to the food. n = 6. Data are presented as mean ± SEM. Statistical significance was evaluated by two-way ANOVA followed by Tukey's post-hoc test (**b**) or one-way ANOVA followed by Tukey's post-hoc test (**d,e**).

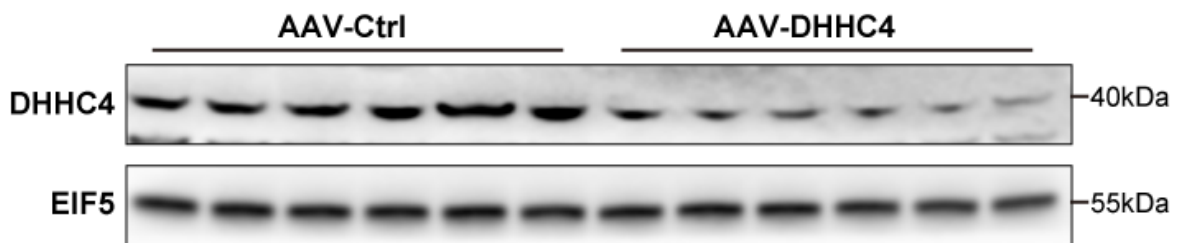

**Supplementary Fig. 3 The validation of cardiomyocyte-specific DHHC4 knockdown mice.** Representative western blot images of the protein level of DHHC4 in cardiac tissues from mice with AAV-DHHC4 or AAV-Ctrl treatment. The protein level was standardized with that of EIF5. n = 6.

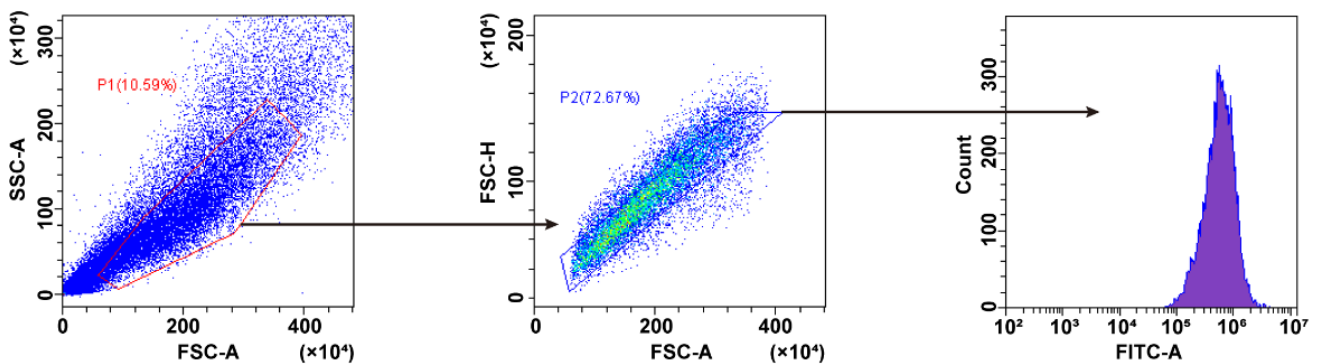

**Supplementary Fig. 4 Gating strategy for Flow Cytometry.**

|                        | NCD                  | HFD/STZ              |
|------------------------|----------------------|----------------------|
| <b>Unconjugated BA</b> |                      |                      |
| CA (nM)                | 144.2 (46.7-222.0)   | 186.8 (36.6-399.0)   |
| CDCA (nM)              | 13.8 (7.4-24.8)      | 10.2 (3.1-12.7)      |
| DCA (nM)               | 24.0 (15.7-96.1)     | 12.2 (3.8-25.4)*     |
| UDCA (nM)              | 21.5 (10.7-31.3)     | 16.6 (12.6-42.5)     |
| LCA (nM)               | 3.4 (0.6-47.3)       | 0.3 (0.1-45.0)       |
| $\alpha$ MCA (nM)      | 47.9 (9.9-75.7)      | 76.7 (50.6-102.4)    |
| $\beta$ MCA (nM)       | 227.4 (74.3-1198.7)  | 684.2 (150.2-1499.7) |
| <b>Conjugated BA</b>   |                      |                      |
| GCA (nM)               | 6.5 (4.7-18.1)       | 4.8 (1.9-6.5)*       |
| TCA (nM)               | 616.1 (523.9-1415.6) | 393.8 (229.5-611.7)* |
| TCDCa (nM)             | 21.6 (8.7-34.6)      | 19.6 (10.7-25.6)     |
| THDCA (nM)             | 1.3 (1.1-3.0)        | 0.8 (0.4-1.4)        |
| TUDCA (nM)             | 40.6 (18.0-72.9)     | 16.0 (8.9-35.5)      |
| TDCA (nM)              | 258.7 (57.4-428.4)   | 240.5 (86.6-320.3)   |
| TLCA (nM)              | 0.4 (0.4-0.4)        | 0.4 (0.4-0.6)        |
| T- $\alpha$ MCA (nM)   | 117.0 (45.3-255.3)   | 103.8 (49.8-172.4)   |
| T- $\beta$ MCA (nM)    | 71.3 (54.4-699.3)    | 144.0 (96.8-1057.0)  |

**Supplementary Table 1** Plasma bile acid profiles in mice with normal control diet (NCD) and HFD/STZ-induced diabetic myocardial injury. Data are presented as medians (interquartile ranges). n = 15. \* $P < 0.05$  versus NCD.

CA: cholic acid; CDCA: chenodeoxycholic acid; DCA: deoxycholic acid; GCA: glycocholic acid; UDCA: ursodeoxycholic acid; TCA: taurocholic acid; TCDCa: taurochenodeoxycholic acid; THDCA: taurohyodeoxycholic acid; TUDCA: tauroursodeoxycholic acid; LCA: lithocholic acid; TDCA: taurodeoxycholic acid; TLCA: tauroolithocholic acid; T- $\alpha$ MCA: tauro  $\alpha$ -Muricholic acid; T- $\beta$ MCA: tauro  $\beta$ -Muricholic acid;  $\alpha$ MCA:  $\alpha$ -Muricholic acid;  $\beta$ MCA:  $\beta$ -Muricholic acid.

|                         | NCD               | HFD/STZ           |
|-------------------------|-------------------|-------------------|
| <b>Unconjugated BA</b>  |                   |                   |
| CA (ng/kg)              | 28.7 (2.6-43.8)   | 5.4 (1.8-11.4)    |
| CDCA (ng/kg)            | 6.6 (3.3-18.3)    | 4.5 (1.2-36.5)    |
| DCA (ng/kg)             | 78.1 (41.1-112.9) | 23.6 (15.0-29.1)* |
| UDCA (ng/kg)            | 0.6 (0.4-2.9)     | 0.3 (0.1-0.9)     |
| LCA (ng/kg)             | 21.0 (13.8-23.4)  | 25.1 (16.4-28.1)  |
| $\alpha$ MCA (ng/kg)    | 8.8 (5.1-21.9)    | 3.8 (2.8-10.0)    |
| $\beta$ MCA (ng/kg)     | 17.3 (3.0-41.2)   | 6.3 (2.2-23.7)    |
| <b>Conjugated BA</b>    |                   |                   |
| GCA (ng/kg)             | 0.5 (0.4-0.8)     | 0.5 (0.2-1.2)     |
| TCA (ng/kg)             | 45.9 (26.7-69.5)  | 2.3 (0.2-9.7)*    |
| TCDCa (ng/kg)           | 4.6 (3.6-8.3)     | 3.0 (0.9-14.4)    |
| THDCA (ng/kg)           | 1.2 (0.6-3.6)     | 1.7 (0.2-8.1)     |
| TUDCA (ng/kg)           | 2.3 (1.0-5.2)     | 1.7 (0.5-6.2)     |
| TDCA (ng/kg)            | 63.0 (27.2-132.6) | 49.3 (20.6-243.0) |
| T- $\alpha$ MCA (ng/kg) | 1.9 (0.9-6.9)     | 1.4 (0.1-11.4)    |
| T- $\beta$ MCA (ng/kg)  | 1.8 (0.5-8.5)     | 0.5 (0.0-30.3)    |

**Supplementary Table 2** Cardiac bile acid profiles in mice with normal NCD and HFD/STZ-induced diabetic myocardial injury. Data are presented as medians (interquartile ranges). n = 15. \* $P < 0.05$  versus NCD.

CA: cholic acid; CDCA: chenodeoxycholic acid; DCA: deoxycholic acid; GCA: glycocholic acid; UDCA: ursodeoxycholic acid; TCA: taurocholic acid; TCDCa: taurochenodeoxycholic acid; THDCA: taurohyodeoxycholic acid; TUDCA: tauroursodeoxycholic acid; LCA: lithocholic acid; TDCA: taurodeoxycholic acid; T- $\alpha$ MCA: tauro  $\alpha$ -Muricholic acid; T- $\beta$ MCA: tauro  $\beta$ -Muricholic acid;  $\alpha$ MCA:  $\alpha$ -Muricholic acid;  $\beta$ MCA:  $\beta$ -Muricholic acid.

|                  | TGR5 <sup>fl/fl</sup> |                | TGR5 <sup>ΔCM</sup> |                |
|------------------|-----------------------|----------------|---------------------|----------------|
|                  | NCD                   | HFD/STZ        | NCD                 | HFD/STZ        |
| Heart rate (bpm) | 488±5                 | 477±14         | 490±16              | 475±10         |
| LVAW;d (mm)      | 0.741±0.024           | 0.743±0.028    | 0.721±0.014         | 0.739±0.014    |
| LVAW;s (mm)      | 0.922±0.012           | 0.951±0.031    | 0.933±0.028         | 0.919±0.017    |
| LVPW;d (mm)      | 0.792±0.021           | 0.857±0.018*   | 0.796±0.019         | 0.860±0.014*   |
| LVPW;s (mm)      | 1.049±0.020           | 1.040±0.030    | 1.008±0.019         | 0.972±0.012    |
| LVID;d (mm)      | 3.283±0.083           | 3.632±0.116*   | 3.107±0.110         | 3.718±0.092*   |
| LVID;s (mm)      | 1.885±0.063           | 2.426±0.086*   | 1.821±0.098         | 2.684±0.099*   |
| E (mm/s)         | 610.123±34.887        | 615.587±32.016 | 547.438±20.665      | 606.867±31.903 |
| A (mm/s)         | 443.265±20.415        | 448.968±23.297 | 384.830±25.434      | 458.415±21.842 |
| E' (mm/s)        | 22.301±1.356          | 17.121±1.069*  | 20.335±0.990        | 12.522±0.467*# |
| A' (mm/s)        | 19.469±1.167          | 20.412±1.602   | 18.801±1.489        | 17.466±0.896   |
| SV (μl)          | 36.347±1.241          | 26.703±1.456*  | 34.625±0.839        | 22.600±0.526*# |
| CO (ml/min)      | 12.517±0.661          | 8.519±0.699*   | 11.392±1.000        | 6.363±0.487*#  |

**Supplementary Table 3** Echocardiographic parameters for TGR5<sup>fl/fl</sup> and TGR5<sup>ΔCM</sup> male mice treated with NCD or HFD/STZ. Data are presented as mean ± SEM. n = 10. \*P<0.05 versus NCD, #P<0.05 versus HFD/STZ TGR5<sup>fl/fl</sup>.

bmp: beats per minutes; LVAW;d: left ventricular end-diastolic anterior wall thickness; LVAW;s: left ventricular end-systolic anterior wall thickness; LVPW;d: left ventricular end-diastolic posterior wall thickness; LVPW;s: left ventricular end-systolic posterior wall thickness; LVID;d: left ventricular end-diastolic diameter; LVID;s: left ventricular end-systolic diameter; SV: stroke volume; CO: cardiac output.

|                  | TGR5 <sup>fl/fl</sup> |                | TGR5 <sup>ΔCM</sup> |                           |
|------------------|-----------------------|----------------|---------------------|---------------------------|
|                  | NCD                   | HFD/STZ        | NCD                 | HFD/STZ                   |
| Heart rate (bpm) | 492±10                | 471±6          | 493±13              | 477±18                    |
| LVAW;d (mm)      | 0.691±0.030           | 0.761±0.011    | 0.681±0.012         | 0.850±0.018* <sup>#</sup> |
| LVAW;s (mm)      | 0.858±0.040           | 0.924±0.022    | 0.905±0.035         | 1.022±0.026* <sup>#</sup> |
| LVPW;d (mm)      | 0.676±0.010           | 0.780±0.030*   | 0.693±0.014         | 0.931±0.004* <sup>#</sup> |
| LVPW;s (mm)      | 0.953±0.044           | 1.016±0.023    | 1.006±0.034         | 1.076±0.014               |
| LVID;d (mm)      | 3.320±0.109           | 3.451±0.113    | 3.135±0.123         | 3.763±0.106*              |
| LVID;s (mm)      | 2.020±0.057           | 2.395±0.092*   | 1.824±0.085         | 2.814±0.098* <sup>#</sup> |
| E (mm/s)         | 563.188±40.046        | 561.885±10.274 | 595.111±30.904      | 594.403±22.856            |
| A (mm/s)         | 413.216±18.574        | 436.113±12.242 | 469.887±24.430      | 447.790±29.667            |
| E' (mm/s)        | 23.280±1.672          | 16.517±0.393*  | 24.629±2.009        | 14.382±1.174*             |
| A' (mm/s)        | 22.558±2.397          | 17.838±0.732   | 21.580±2.177        | 16.810±0.954              |
| SV (μl)          | 36.638±0.514          | 28.325±0.904*  | 35.908±0.16         | 25.221±0.586*             |
| CO (ml/min)      | 14.034±0.368          | 11.293±0.514*  | 14.205±0.277        | 9.071±0.540* <sup>#</sup> |

**Supplementary Table 4** Echocardiographic parameters for TGR5<sup>fl/fl</sup> and TGR5<sup>ΔCM</sup> female mice treated with NCD or HFD/STZ. Data are presented as mean ± SEM. n = 10. \**P*<0.05 versus NCD, <sup>#</sup>*P*<0.05 versus HFD/STZ TGR5<sup>fl/fl</sup>.

bmp: beats per minutes; LVAW;d: left ventricular end-diastolic anterior wall thickness; LVAW;s: left ventricular end-systolic anterior wall thickness; LVPW;d: left ventricular end-diastolic posterior wall thickness; LVPW;s: left ventricular end-systolic posterior wall thickness; LVID;d: left ventricular end-diastolic diameter; LVID;s: left ventricular end-systolic diameter; SV: stroke volume; CO: cardiac output.

|                  | TGR5 <sup>fl/fl</sup> |                | TGR5 <sup>ΔCM</sup> |                |
|------------------|-----------------------|----------------|---------------------|----------------|
|                  | <i>db/m</i>           | <i>db/db</i>   | <i>db/m</i>         | <i>db/db</i>   |
| Heart rate (bpm) | 475±6                 | 459±7          | 480±8               | 469±13         |
| LVAW;d (mm)      | 0.544±0.014           | 0.703±0.028*   | 0.567±0.025         | 0.758±0.032*   |
| LVAW;s (mm)      | 0.633±0.010           | 0.840±0.036*   | 0.667±0.009         | 0.861±0.023*   |
| LVPW;d (mm)      | 0.623±0.022           | 0.819±0.019*   | 0.635±0.019         | 0.894±0.013**  |
| LVPW;s (mm)      | 0.738±0.016           | 0.977±0.035*   | 0.727±0.014         | 1.042±0.020*   |
| LVID;d (mm)      | 3.054±0.113           | 3.752±0.087*   | 3.416±0.117         | 4.256±0.070**  |
| LVID;s (mm)      | 1.834±0.088           | 2.507±0.077*   | 2.089±0.089         | 3.100±0.035**  |
| E (mm/s)         | 570.546±42.784        | 656.694±25.639 | 584.599±27.933      | 656.980±16.976 |
| A (mm/s)         | 441.437±34.591        | 465.659±31.778 | 427.041±8.306       | 394.593±28.962 |
| E' (mm/s)        | 22.223±1.342          | 19.531±0.931   | 22.637±1.412        | 13.811±0.716** |
| A' (mm/s)        | 19.081±1.208          | 15.896±1.531   | 20.223±1.334        | 19.538±1.133   |
| SV (μl)          | 40.966±0.629          | 38.942±1.302   | 41.581±0.712        | 28.764±1.533** |
| CO (ml/min)      | 16.296±0.281          | 12.178±0.487*  | 16.854±0.550        | 8.496±0.841**  |

**Supplementary Table 5** Echocardiographic parameters for TGR5<sup>fl/fl</sup> and TGR5<sup>ΔCM</sup> mice in *db/m* or *db/db* background. Data are presented as mean ± SEM. n = 6. \**P*<0.05 versus *db/m*, #*P*<0.05 versus *db/db* TGR5<sup>fl/fl</sup>. bmp: beats per minutes; LVAW;d: left ventricular end-diastolic anterior wall thickness; LVAW;s: left ventricular end-systolic anterior wall thickness; LVPW;d: left ventricular end-diastolic posterior wall thickness; LVPW;s: left ventricular end-systolic posterior wall thickness; LVID;d: left ventricular end-diastolic diameter; LVID;s: left ventricular end-systolic diameter; SV: stroke volume; CO: cardiac output.

|                  | <i>db/db</i> TGR5 <sup>fl/fl</sup> |                | <i>db/db</i> TGR5 <sup>ΔCM</sup> |                |
|------------------|------------------------------------|----------------|----------------------------------|----------------|
|                  | Vehicle                            | INT-777        | Vehicle                          | INT-777        |
| Heart rate (bpm) | 460±5                              | 451±4          | 462±13                           | 476±16         |
| LVAW;d (mm)      | 0.837±0.028                        | 0.735±0.022*   | 0.836±0.012                      | 0.844±0.019    |
| LVAW;s (mm)      | 0.965±0.043                        | 0.879±0.017    | 0.863±0.016                      | 0.906±0.020    |
| LVPW;d (mm)      | 0.883±0.017                        | 0.767±0.020*   | 0.868±0.029                      | 0.863±0.016    |
| LVPW;s (mm)      | 1.016±0.024                        | 0.966±0.028    | 0.957±0.034                      | 0.975±0.018    |
| LVID;d (mm)      | 3.894±0.131                        | 3.417±0.060*   | 4.099±0.080                      | 4.051±0.174    |
| LVID;s (mm)      | 2.726±0.126                        | 2.035±0.102*   | 3.213±0.085                      | 3.047±0.178    |
| E (mm/s)         | 633.186±26.636                     | 617.262±11.610 | 653.952±32.586                   | 621.961±34.550 |
| A (mm/s)         | 422.471±20.611                     | 425.934±27.244 | 474.571±29.421                   | 401.905±40.939 |
| E' (mm/s)        | 13.208±0.623                       | 18.102±0.582*  | 11.168±0.966                     | 10.711±0.503   |
| A' (mm/s)        | 16.024±0.938                       | 17.650±0.302   | 17.110±1.353                     | 16.996±1.434   |
| SV (μl)          | 32.788±0.920                       | 38.495±1.268*  | 24.898±1.853                     | 26.566±1.084   |
| CO (ml/min)      | 10.216±0.477                       | 13.642±0.695*  | 9.022±0.475                      | 8.697±0.242    |

**Supplementary Table 6** Echocardiographic parameters for *db/db* TGR5<sup>fl/fl</sup> and *db/db* TGR5<sup>ΔCM</sup> mice treated with or without INT-777. Data are presented as mean ± SEM. n = 6. \*P<0.05 versus Vehicle.

bmp: beats per minutes; LVAW;d: left ventricular end-diastolic anterior wall thickness; LVAW;s: left ventricular end-systolic anterior wall thickness; LVPW;d: left ventricular end-diastolic posterior wall thickness; LVPW;s: left ventricular end-systolic posterior wall thickness; LVID;d: left ventricular end-diastolic diameter; LVID;s: left ventricular end-systolic diameter; SV: stroke volume; CO: cardiac output.

|                  | AAV-Ctrl              |                     | AAV-DHHC4             |                     |
|------------------|-----------------------|---------------------|-----------------------|---------------------|
|                  | TGR5 <sup>fl/fl</sup> | TGR5 <sup>ΔCM</sup> | TGR5 <sup>fl/fl</sup> | TGR5 <sup>ΔCM</sup> |
| Heart rate (bpm) | 465±8                 | 480±12              | 463±9                 | 452±9               |
| LVAW;d (mm)      | 0.799±0.031           | 0.847±0.013         | 0.636±0.044*          | 0.713±0.045*        |
| LVAW;s (mm)      | 0.889±0.019           | 0.919±0.026         | 0.739±0.063*          | 0.801±0.051         |
| LVPW;d (mm)      | 0.872±0.032           | 0.937±0.016         | 0.736±0.040*          | 0.768±0.045*        |
| LVPW;s (mm)      | 1.020±0.022           | 1.057±0.024         | 0.875±0.074           | 0.926±0.065         |
| LVID;d (mm)      | 3.767±0.139           | 3.937±0.133         | 3.209±0.196*          | 3.611±0.179         |
| LVID;s (mm)      | 2.647±0.147           | 3.013±0.097         | 2.030±0.149*          | 2.308±0.143*        |
| E (mm/s)         | 621.504±45.220        | 629.730±12.974      | 645.064±72.182        | 579.344±34.870      |
| A (mm/s)         | 421.671±42.359        | 469.903±12.820      | 421.214±14.717        | 439.838±29.328      |
| E' (mm/s)        | 14.494±0.937          | 12.147±0.344        | 20.373±1.733*         | 18.167±2.096*       |
| A' (mm/s)        | 15.939±1.395          | 15.400±1.684        | 20.073±2.386          | 18.362±1.916        |
| SV (μl)          | 27.735±0.673          | 22.810±0.775        | 35.153±0.812*         | 32.966±1.014*       |
| CO (ml/min)      | 11.088±0.337          | 9.165±0.576         | 13.583±0.361*         | 12.605±0.390*       |

**Supplementary Table 7** Echocardiographic parameters for HFD/STZ TGR5<sup>fl/fl</sup> and TGR5<sup>ΔCM</sup> mice treated with or without AAV-DHHC4. Data are presented as mean ± SEM. n = 8. \*P<0.05 versus AAV-Ctrl.

bmp: beats per minutes; LVAW;d: left ventricular end-diastolic anterior wall thickness; LVAW;s: left ventricular end-systolic anterior wall thickness; LVPW;d: left ventricular end-diastolic posterior wall thickness; LVPW;s: left ventricular end-systolic posterior wall thickness; LVID;d: left ventricular end-diastolic diameter; LVID;s: left ventricular end-systolic diameter; SV: stroke volume; CO: cardiac output.

| Groups               | Healthy participants<br>(n=48) | T2DM with LVHT<br>(n=50) | T2DM with HF<br>(n=42)     |
|----------------------|--------------------------------|--------------------------|----------------------------|
| Age, y               | 50 (44-56)                     | 59 (50-65)               | 53 (47-60)                 |
| Female gender, n (%) | 23 (48)                        | 25 (50)                  | 17 (40)                    |
| HbA1c (%)            | 4.60 (4.30-5.20)               | 6.50 (5.80-7.30)*        | 6.80 (6.60-7.18)*          |
| TC (mmol/L)          | 3.94 (3.64-4.34)               | 3.81 (3.39-4.40)         | 3.92 (3.22-4.49)           |
| TG (mmol/L)          | 0.83 (0.64-0.93)               | 1.27 (0.99-1.90)*        | 1.18 (0.89-1.69)*          |
| HDL-C (mmol/L)       | 1.32 (1.14-1.49)               | 1.07 (0.90-1.32)*        | 0.83 (0.70-0.99)*#         |
| LDL-C (mmol/L)       | 1.96 (1.75-2.17)               | 2.20 (1.71-2.81)         | 2.51 (1.97-3.01)*          |
| cTnI (ng/mL)         | -                              | 0.01 (0.01-0.06)         | 0.03 (0.02-0.06)           |
| CK-MB (ng/mL)        | -                              | 1.35 (0.85-2.04)         | 1.80 (1.13-2.43)           |
| NT-proBNP (pg/mL)    | -                              | 851.75 (276.08-1881.25)  | 2854.00 (1524.75-4797.25)# |
| LVEF (%)             | -                              | 60.50 (56.00-65.00)      | 25.00 (22.25-28.00)#       |
| <b>Male</b>          |                                |                          |                            |
| Age, y               | 46 (40-50)                     | 59 (46-65)               | 53 (48-60)                 |
| HbA1c (%)            | 4.60 (4.30-5.20)               | 6.65 (5.98-7.15)*        | 6.70 (6.50-7.10)*          |
| TC (mmol/L)          | 3.98 (3.66-4.38)               | 3.72 (3.36-4.09)         | 3.94 (3.47-4.37)           |
| TG (mmol/L)          | 0.82 (0.64-0.94)               | 1.38 (0.94-1.91)*        | 1.22 (0.89-2.01)*          |
| HDL-C (mmol/L)       | 1.30 (1.18-1.39)               | 1.01 (0.83-1.15)*        | 0.81(0.70-0.94)#           |
| LDL-C (mmol/L)       | 1.95 (1.67-2.15)               | 2.12 (1.58-2.37)         | 2.46 (2.19-2.98)*          |
| cTnI (ng/mL)         | -                              | 0.02 (0.01-0.06)         | 0.03 (0.02-0.06)           |
| CK-MB (ng/mL)        | -                              | 1.30 (0.98-2.13)         | 1.93 (1.50-2.43)           |
| NT-proBNP (pg/mL)    | -                              | 527.40 (210.00-1069.00)  | 3255.00 (1670.00-4889.00)# |
| LVEF (%)             | -                              | 60.00 (55.00-65.00)      | 25.00 (23.00-28.00)#       |
| <b>Female</b>        |                                |                          |                            |
| Age, y               | 55 (49-58)                     | 58 (54-65)               | 50 (45-57)                 |
| HbA1c (%)            | 4.60 (4.40-5.50)               | 6.40 (5.70-7.50)*        | 6.80 (6.70-7.30)*          |
| TC (mmol/L)          | 3.94 (3.45-4.32)               | 4.20 (3.49-4.78)         | 3.80 (2.99-4.60)           |
| TG (mmol/L)          | 0.83 (0.64-0.92)               | 1.21 (1.00-1.46)*        | 1.07 (0.89-1.51)*          |
| HDL-C (mmol/L)       | 1.32 (1.10-1.56)               | 1.15 (0.97-1.36)         | 0.89 (0.69-1.24)*#         |
| LDL-C (mmol/L)       | 1.99 (1.79-2.29)               | 2.38 (1.91-3.13)         | 2.60 (1.90-3.02)           |
| cTnI (ng/mL)         | -                              | 0.01 (0.01-0.05)         | 0.03 (0.01-0.10)           |
| CK-MB (ng/mL)        | -                              | 1.53 (0.82-2.03)         | 1.35 (0.98-2.36)           |
| NT-proBNP (pg/mL)    | -                              | 1191.00 (358.00-2423.00) | 2617.00 (1316.00-3917.00)# |
| LVEF (%)             | -                              | 61.00 (56.00-65.00)      | 26.00 (21.00-27.00)#       |

**Supplementary Table 8 Characteristics of included study participants.** HbA1c: glycated hemoglobin; TC: total cholesterol; TG: triglyceride; HDL-C: high-density lipoprotein cholesterol; LDL-C: low-density lipoprotein cholesterol; cTnI: cardiac troponin; CK-MB: creatine kinase isoenzymes; NT-proBNP: N-terminal pro-brain natriuretic peptide; LVEF: left ventricular ejection fractions. Data are presented as n (%) for gender and medians (interquartile ranges) for other clinical indicators. \* $P < 0.05$  versus healthy subjects, # $P < 0.05$  versus T2DM with LVHT.

|                        | Healthy participants  | T2DM with LVHT       | T2DM with HF          |
|------------------------|-----------------------|----------------------|-----------------------|
| <b>Unconjugated BA</b> |                       |                      |                       |
| CA (nM)                | 85.9 (54.6-171.5)     | 54.4 (30.0-117.9)    | 72.2 (20.3-121.0)     |
| CDCA (nM)              | 155.7 (104.9-243.8)   | 153.2 (29.5-232.1)   | 70.3 (5.9-161.1)      |
| DCA (nM)               | 450.5 (248.3-690.0)   | 179.6 (119.7-338.0)* | 70.2 (32.7-124.5)*#   |
| UDCA (nM)              | 53.7 (32.4-91.5)      | 41.3 (13.5-114.8)    | 33.0 (20.4-63.1)      |
| LCA (nM)               | 28.0 (14.6-35.8)      | 22.2 (13.1-34.4)     | 18.7 (11.4-31.7)      |
| <b>Conjugated BA</b>   |                       |                      |                       |
| GCA (nM)               | 304.0 (120.7-803.0)   | 188.0 (103.0-391.4)  | 161.7 (43.2-235.3)*   |
| GUDCA (nM)             | 136.9 (76.1-252.6)    | 102.6 (31.5-253.3)   | 110.1 (32.2-723.8)    |
| GCDCA (nM)             | 719.8 (369.2-1226.4)  | 520.8 (252.1-773.3)  | 445.8 (278.1-916.0)   |
| GDCA (nM)              | 895.3 (402.3-1593.6)  | 627.6 (130.5-2246.1) | 463.3 (124.2-3220.4)  |
| GLCA (nM)              | 44.2 (22.7-109.1)     | 51.3 (24.0-67.8)     | 50.4 (28.0-130.7)     |
| TCA (nM)               | 62.5 (20.2-113.3)     | 23.1 (12.6-46.9)*    | 16.5 (9.3-23.9)*      |
| TCDCa (nM)             | 61.5 (18.6-89.1)      | 28.0 (16.2-57.0)     | 29.4 (14.8-56.8)      |
| THDCA (nM)             | 2.9 (1.3-4.6)         | 1.3 (0.6-3.1)        | 1.5 (0.5-3.7)         |
| TUDCA (nM)             | 10.9 (5.3-24.2)       | 7.7 (5.2-16.0)       | 8.2 (3.4-19.0)        |
| TDCA (nM)              | 20.2 (5.7-86.2)       | 12.4 (5.0-20.6)      | 16.2 (5.3-49.0)       |
| TLCA (nM)              | 1.8 (0.9-3.1)         | 1.4 (0.9-2.6)        | 1.8 (1.0-3.2)         |
| <b>Male</b>            |                       |                      |                       |
| <b>Unconjugated BA</b> |                       |                      |                       |
| CA (nM)                | 96.4 (75.0-174.1)     | 79.7 (30.0-164.3)    | 77.7 (36.9-153.6)     |
| CDCA (nM)              | 186.5 (117.4-256.9)   | 142.0 (49.9-192.2)   | 54.6 (4.1-155.6)      |
| DCA (nM)               | 560.4 (285.1-649.4)   | 163.0 (124.8-256.7)* | 90.4 (33.8-132.4)*#   |
| UDCA (nM)              | 53.6 (18.9-124.7)     | 44.5 (16.6-114.2)    | 27.9 (11.3-69.4)      |
| LCA (nM)               | 31.5 (14.1-39.9)      | 16.4 (12.8-31.9)     | 14.1 (11.7-21.3)      |
| <b>Conjugated BA</b>   |                       |                      |                       |
| GCA (nM)               | 401.3 (104.4-820.7)   | 171.7 (102.1-463.2)  | 144.5 (15.5-253.4)*   |
| GUDCA (nM)             | 135.5 (62.0-248.8)    | 119.2 (26.6-515.5)   | 112.7 (30.3-369.3)    |
| GCDCA (nM)             | 642.3 (304.8-1270.0)  | 506.0 (222.7-878.6)  | 666.4 (375.3-1250.9)  |
| GDCA (nM)              | 1012.5 (382.0-2617.9) | 748.9 (315.5-2478.5) | 1065.7 (221.5-3871.7) |
| GLCA (nM)              | 41.9 (20.3-109.1)     | 59.5 (24.0-69.0)     | 60.4 (28.6-107.0)     |
| TCA (nM)               | 71.6 (22.9-128.8)     | 25.1 (16.9-58.1)     | 12.5 (7.8-19.3)*      |
| TCDCa (nM)             | 58.9 (19.6-85.8)      | 31.5 (10.5-52.0)     | 34.6 (16.3-78.6)      |
| THDCA (nM)             | 2.9 (1.2-4.8)         | 1.5 (0.7-3.3)        | 1.6 (0.3-3.9)         |
| TUDCA (nM)             | 8.9 (5.2-18.0)        | 6.4 (5.2-21.1)       | 7.4 (3.8-18.8)        |
| TDCA (nM)              | 11.2 (4.6-87.7)       | 11.1 (6.4-20.4)      | 9.3 (5.4-43.3)        |
| TLCA (nM)              | 1.6 (0.9-2.5)         | 1.6 (0.9-2.5)        | 2.1 (1.4-3.2)         |
| <b>Female</b>          |                       |                      |                       |
| <b>Unconjugated BA</b> |                       |                      |                       |
| CA (nM)                | 55.0 (41.8-143.5)     | 47.5 (27.6-108.3)    | 30.0 (13.3-87.8)      |
| CDCA (nM)              | 144.4 (90.4-208.1)    | 178.6 (18.6-281.9)   | 110.1 (30.3-200.5)    |
| DCA (nM)               | 346.0 (230.5-697.2)   | 232.8 (87.8-344.0)*  | 62.0 (27.4-87.2)*#    |
| UDCA (nM)              | 53.7 (38.9-84.2)      | 31.1 (10.6-115.0)    | 35.5 (27.3-51.3)      |
| LCA (nM)               | 26.9 (16.2-33.6)      | 31.2 (13.8-35.7)     | 29.1 (11.3-34.6)      |
| <b>Conjugated BA</b>   |                       |                      |                       |
| GCA (nM)               | 217.4 (124.4-649.2)   | 196.9 (106.9-263.2)  | 174.7 (105.7-228.8)   |
| GUDCA (nM)             | 138.3 (84.1-276.7)    | 93.3 (44.0-187.7)    | 107.5 (42.7-861.8)    |

|            |                      |                     |                     |
|------------|----------------------|---------------------|---------------------|
| GCDCA (nM) | 736.9 (481.1-1064.1) | 535.6 (302.7-716.4) | 419.6 (273.2-567.8) |
| GDCA (nM)  | 822.1 (469.5-1363.7) | 426.4 (90.4-1884.8) | 159.6 (87.1-2175.5) |
| GLCA (nM)  | 46.8 (22.9-109.1)    | 32.8 (27.3-56.2)    | 43.2 (23.3-172.0)   |
| TCA (nM)   | 54.1 (20.3-109.9)    | 15.9 (12.2-32.2)*   | 21.6 (18.4-36.1)    |
| TCDCa (nM) | 61.5 (18.3-150.4)    | 25.8 (20.3-77.2)    | 25.3 (14.1-49.0)    |
| THDCA (nM) | 3.0 (1.5-4.5)        | 1.2 (0.7-2.1)       | 1.5 (0.8-3.1)       |
| TUDCA (nM) | 18.4 (5.4-35.0)      | 11.1 (4.8-14.2)     | 12.6 (3.4-49.8)     |
| TDCA (nM)  | 28.9 (10.9-81.6)     | 16.7 (4.2-26.1)     | 18.0 (5.3-44.5)     |
| TLCA (nM)  | 2.3 (1.3-3.5)        | 1.4 (0.8-2.5)       | 1.2 (0.7-3.3)       |

**Supplementary Table 9** Bile acid profiles in collected clinical plasma samples from healthy participants (n = 48), T2DM with LVHT (n = 50) and T2DM with HF (n = 42). Data are presented as medians (interquartile ranges). \* $P < 0.05$  versus healthy participants, # $P < 0.05$  versus T2DM with LVHT.

CA: cholic acid; CDCA: chenodeoxycholic acid; DCA: deoxycholic acid; UDCA: ursodeoxycholic acid; LCA: lithocholic acid; GCA: glycocholic acid; GUDCA: glyoursodeoxycholic acid; GCDCA: glycochenodeoxycholic acid; GDCA: glycodeoxycholic acid; GLCA: glycolithocholic acid; TCA: taurocholic acid; TCDCa: taurochenodeoxycholic acid; THDCA: taurohyodeoxycholic acid; TUDCA: tauroursodeoxycholic acid; TDCA: taurodeoxycholic acid; TLCA: tauroolithocholic acid.

| Name                                            | Sequences of oligonucleotides (5'→3') |                                |
|-------------------------------------------------|---------------------------------------|--------------------------------|
|                                                 | Forward                               | Reverse                        |
| (A) Primers for mouse Generation and Genotyping |                                       |                                |
| <i>Tgr5<sup>fllox</sup></i>                     | 5'-CATGCTTGTAGGGTGATGTGACAG-3'        | 5'-TGTGCTGAAGCAAGGTCTCACTC-3'  |
| <i>αMHC-cre</i>                                 | 5'-ATGACAGACAGATCCCTCCTATCTCC-3'      | 5'-CTCATCACTCGTTGCATCATCGAC-3' |
| (B) shRNA tarGetinG sequence (mouse)            |                                       |                                |
| <i>Dhhc4</i>                                    | 5'-CCACAAATGAATGGTATAAAG-3'           | 5'-CTTTATACCATTTCATTTGTGG-3'   |
| (C) siRNA tarGetinG sequence (mouse)            |                                       |                                |
| <i>Dhhc4</i>                                    | 5'-UCCUACUGGGCUUUGUCATT-3'            | 5'-UGACAAAGCCCAGUAGGAATT-3'    |
| (D) qPCR Primers (mouse)                        |                                       |                                |
| <i>Tgr5</i>                                     | 5'-TCCTGTCAGTCTTGGCCTATGA-3'          | 5'-GGTGCTGCCCAATGAGATG-3'      |
| <i>18s</i>                                      | 5'-GTAACCCGTTGAACCCATT-3'             | 5'-CCATCCAATCGGTAGTAGCG-3'     |

**Supplementary Table 10** Sequences of oligonucleotides.
